# Supplementary material for: Computational analysis of hot spots and binding mechanism in the PD-1/PD-L1 interaction
Source: PubMed Central journal article supplement — RSC Adv. 2019 May 14;9(26):14944–56. doi: 10.1039/c9ra01369e (PMC9064197; doi:10.1039/c9ra01369e), 2019-05-14
Supplement: RA-009-C9RA01369E-s001.pdf [file RA-009-C9RA01369E-s001.pdf]

**Supporting Information**  
**Computational Analysis of Hot Spots and Binding Mechanism in the PD-1/PD-L1 Interaction**

Dading Huang<sup>1</sup>, Wei Wen<sup>1</sup>, Xiao Liu<sup>1</sup>, Yang Li<sup>1</sup>, John Z.H. Zhang<sup>1,2,3</sup>

<sup>1</sup>*State Key Laboratory for Precision Spectroscopy, Shanghai Engineering Research Center of Molecular Therapeutics & New Drug Development, School of Chemistry and Molecular Engineering, East China Normal University, Shanghai 200062, China*

<sup>2</sup>*NYU-ECNU Center for Computational Chemistry at NYU Shanghai, Shanghai 200062, China*

<sup>3</sup>*Department of Chemistry, New York University, NY, NY 10003, USA*

\*To whom correspondence should be addressed: [john.zhang@nyu.edu](mailto:john.zhang@nyu.edu)

**Keywords:** PPI, PD-1/PD-L1, Computational alanine scanning, Hot spots, Binding free energy, MM/GBSA, Interaction entropy, Structural Biology, Immunotherapy

Table S1. Result of computational alanine scanning for the PD-1/PD-L1 interaction.

| Mutation        | $\Delta\Delta E_{\text{vdW}}$ | $\Delta\Delta E_{\text{ele}}$ | $\Delta\Delta G_{\text{gb}}$ | $\Delta\Delta G_{\text{np}}$ | $\Delta\Delta H$ | SD1 <sup>a</sup> | $\Delta\Delta I E$ | SD2 <sup>b</sup> | $\Delta\Delta G$ | SD <sup>c</sup> |
|-----------------|-------------------------------|-------------------------------|------------------------------|------------------------------|------------------|------------------|--------------------|------------------|------------------|-----------------|
| <b>(A) PD-1</b> |                               |                               |                              |                              |                  |                  |                    |                  |                  |                 |
| Q75A            | 4.14                          | 10.77                         | -8.48                        | 0.34                         | 6.78             | 0.27             | -1.48              | 0.28             | 5.30             | 0.54            |
| I134A           | 5.91                          | -0.29                         | -0.80                        | 0.12                         | 4.95             | 0.22             | -0.87              | 0.26             | 4.09             | 0.46            |
| I126A           | 4.53                          | -0.01                         | -0.41                        | -0.08                        | 4.03             | 0.12             | -0.60              | 0.03             | 3.42             | 0.10            |
| E84A            | 2.03                          | 11.58                         | -8.62                        | 0.09                         | 5.08             | 0.14             | -2.08              | 0.18             | 3.01             | 0.24            |
| K78A            | 2.98                          | 4.33                          | -2.93                        | 0.07                         | 4.46             | 0.17             | -1.58              | 0.07             | 2.88             | 0.21            |
| Y68A            | 1.80                          | 5.23                          | -3.74                        | -0.08                        | 3.22             | 0.23             | -0.84              | 0.07             | 2.38             | 0.27            |
| L128A           | 3.56                          | -0.38                         | -0.67                        | 0.14                         | 2.65             | 0.10             | -0.38              | 0.03             | 2.27             | 0.12            |
| N66A            | 1.39                          | 3.15                          | -2.06                        | -0.06                        | 2.42             | 0.04             | -0.38              | 0.03             | 2.04             | 0.07            |
| K131A           | 1.69                          | 7.31                          | -7.43                        | 0.19                         | 1.76             | 0.08             | -0.58              | 0.06             | 1.18             | 0.09            |
| V64A            | 1.31                          | -0.20                         | -0.52                        | -0.01                        | 0.57             | 0.07             | -0.12              | 0.02             | 0.46             | 0.06            |
| Q133A           | 1.01                          | 1.74                          | -2.15                        | 0.10                         | 0.70             | 0.23             | -0.34              | 0.10             | 0.36             | 0.15            |
| T76A            | 2.03                          | 2.01                          | -2.41                        | 0.00                         | 1.64             | 0.27             | -1.36              | 0.09             | 0.27             | 0.32            |
| L122A           | 0.55                          | -0.12                         | -0.11                        | -0.03                        | 0.29             | 0.07             | -0.02              | 0.01             | 0.27             | 0.07            |
| M70A            | 0.53                          | -1.16                         | 0.93                         | 0.00                         | 0.30             | 0.23             | -0.11              | 0.10             | 0.19             | 0.13            |
| D77A            | 0.30                          | 2.51                          | -2.37                        | 0.03                         | 0.48             | 0.08             | -0.38              | 0.20             | 0.09             | 0.14            |
| S127A           | 0.03                          | 0.25                          | -0.26                        | 0.00                         | 0.02             | 0.01             | 0.00               | 0.00             | 0.01             | 0.01            |
| N74A            | 0.42                          | -1.40                         | 1.02                         | 0.03                         | 0.08             | 0.05             | -0.12              | 0.02             | -0.05            | 0.03            |
| R139A           | 0.34                          | -2.79                         | 2.43                         | 0.03                         | 0.01             | 0.13             | -0.20              | 0.03             | -0.19            | 0.11            |
| Q88A            | 0.45                          | -0.61                         | 0.21                         | 0.12                         | 0.18             | 0.30             | -0.44              | 0.25             | -0.27            | 0.13            |
| K135A           | 0.54                          | 10.61                         | -10.18                       | 0.17                         | 1.14             | 0.41             | -1.77              | 0.68             | -0.63            | 0.39            |
| S73A            | -0.90                         | 2.93                          | -2.47                        | 0.01                         | -0.43            | 0.20             | -0.90              | 0.41             | -1.34            | 0.60            |

|                  |       |       |       |       |      |      |       |      |       |      |
|------------------|-------|-------|-------|-------|------|------|-------|------|-------|------|
| E136A            | -1.19 | 10.94 | -8.66 | 0.16  | 1.25 | 0.10 | -2.95 | 0.23 | -1.70 | 0.24 |
| <b>(B) PD-L1</b> |       |       |       |       |      |      |       |      |       |      |
| Y123A            | 7.14  | 3.96  | -3.98 | 0.49  | 7.60 | 0.50 | -1.69 | 0.11 | 5.92  | 0.46 |
| Y56A             | 5.24  | 0.50  | -0.68 | 0.04  | 5.10 | 0.28 | -0.52 | 0.04 | 4.59  | 0.27 |
| R125A            | 4.64  | -2.21 | 1.50  | 0.55  | 4.48 | 0.38 | -1.39 | 0.10 | 3.09  | 0.41 |
| M115A            | 3.93  | -0.96 | -0.03 | 0.06  | 2.99 | 0.12 | -0.47 | 0.04 | 2.52  | 0.10 |
| R113A            | 2.59  | 0.48  | 0.62  | 0.30  | 3.99 | 0.72 | -1.84 | 0.10 | 2.15  | 0.65 |
| Q66A             | 2.25  | 3.16  | -2.92 | 0.04  | 2.53 | 0.03 | -0.43 | 0.04 | 2.11  | 0.04 |
| I54A             | 1.88  | -0.08 | -0.38 | 0.13  | 1.55 | 0.05 | -0.14 | 0.00 | 1.41  | 0.04 |
| K124A            | 3.02  | 3.21  | -3.56 | 0.34  | 3.01 | 0.11 | -1.78 | 0.52 | 1.23  | 0.59 |
| E58A             | 0.87  | 10.12 | -9.66 | 0.05  | 1.38 | 0.13 | -0.61 | 0.16 | 0.77  | 0.11 |
| V76A             | 1.43  | -0.25 | -0.51 | 0.06  | 0.72 | 0.09 | -0.15 | 0.00 | 0.57  | 0.10 |
| F19A             | 0.46  | -0.28 | 0.38  | 0.00  | 0.56 | 0.01 | 0.01  | 0.05 | 0.57  | 0.06 |
| T20A             | 0.75  | -0.37 | 0.15  | 0.05  | 0.59 | 0.04 | -0.05 | 0.01 | 0.54  | 0.03 |
| V23A             | 0.63  | -0.09 | 0.02  | -0.01 | 0.55 | 0.12 | -0.03 | 0.01 | 0.53  | 0.13 |
| D122A            | 0.32  | 9.34  | -7.65 | 0.01  | 2.01 | 0.08 | -1.49 | 0.13 | 0.53  | 0.17 |
| D73A             | 0.13  | 6.39  | -6.02 | 0.00  | 0.50 | 0.01 | -0.16 | 0.02 | 0.34  | 0.03 |
| I126A            | 0.20  | -0.01 | 0.12  | 0.00  | 0.32 | 0.01 | 0.00  | 0.00 | 0.32  | 0.01 |
| N63A             | 0.87  | -0.63 | 0.12  | 0.10  | 0.47 | 0.07 | -0.16 | 0.03 | 0.31  | 0.05 |
| S117A            | 0.50  | -0.08 | -0.12 | 0.02  | 0.32 | 0.04 | -0.04 | 0.00 | 0.28  | 0.04 |
| V68A             | 0.46  | -0.03 | -0.18 | 0.03  | 0.29 | 0.04 | -0.01 | 0.00 | 0.27  | 0.03 |
| D26A             | -0.50 | 9.05  | -7.89 | 0.13  | 0.79 | 0.16 | -1.80 | 0.46 | -1.01 | 0.51 |

<sup>a</sup>Standard deviation of  $\Delta\Delta H$ .

<sup>b</sup>Standard deviation of  $\Delta\Delta IE$ .

<sup>c</sup>Standard deviation of  $\Delta\Delta G$ .

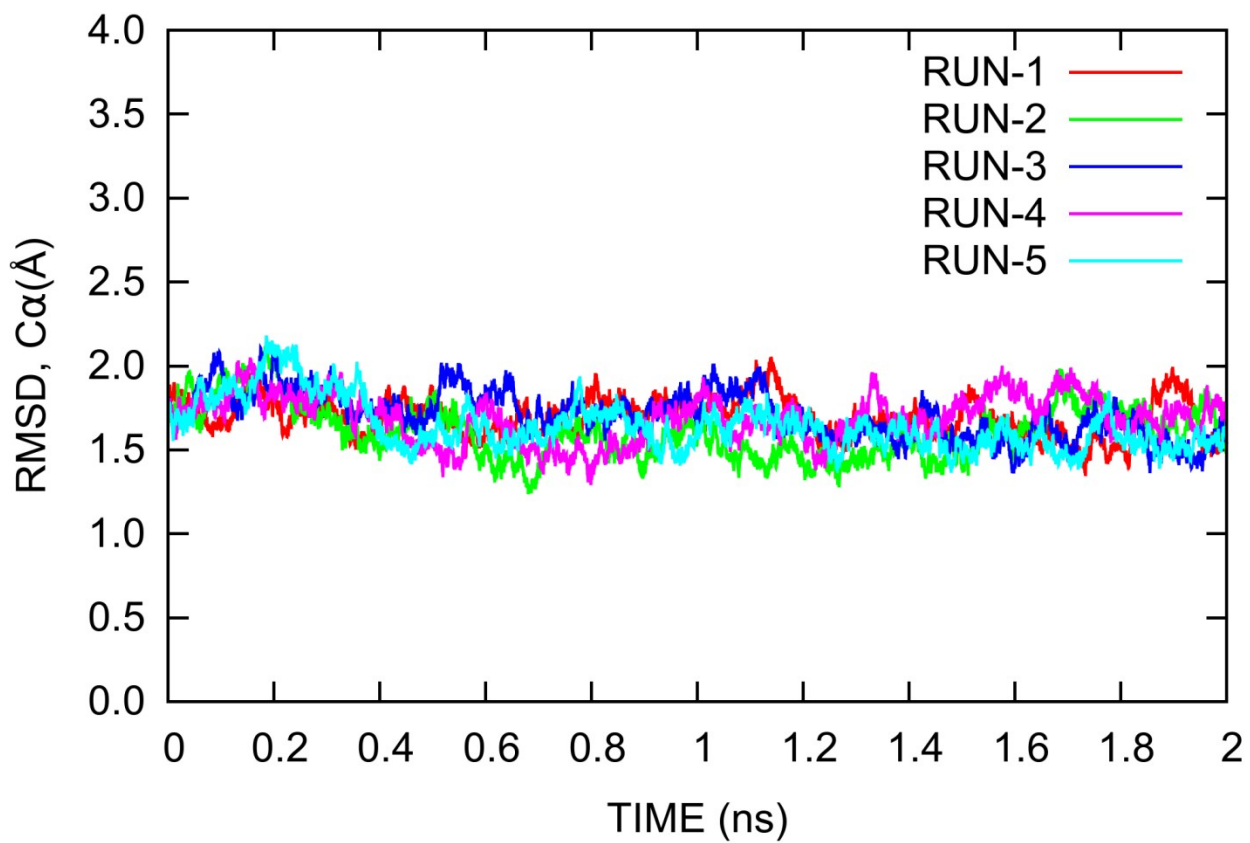

Figure S1. RMSDs of the C $\alpha$  atoms of the PD-1/PD-L1 complex of the 5 production runs relative to the initial crystal structure in the final 2 ns..

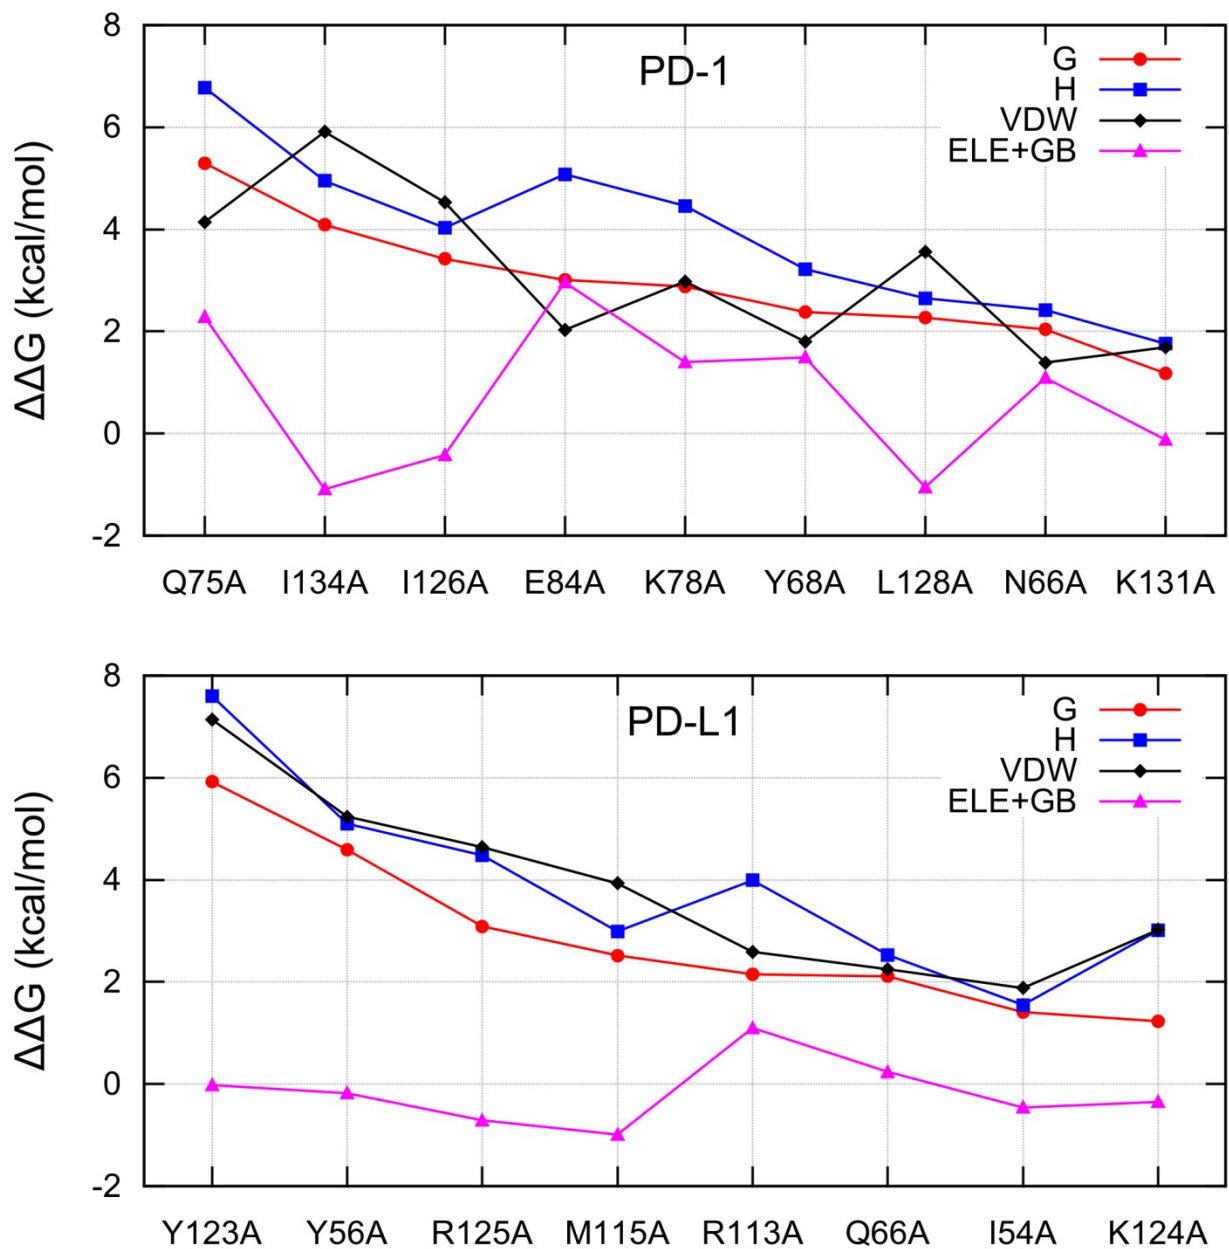

Figure S2. Energy components of the hot and warm spots predicted by the computational alanine scanning. For each hot spot,  $\Delta\Delta G$  (red),  $\Delta\Delta H$  (blue),  $\Delta\Delta E_{vdw}$  (black) and  $\Delta\Delta E_{ele} + \Delta\Delta G_{gb}$  (pink) are displayed.

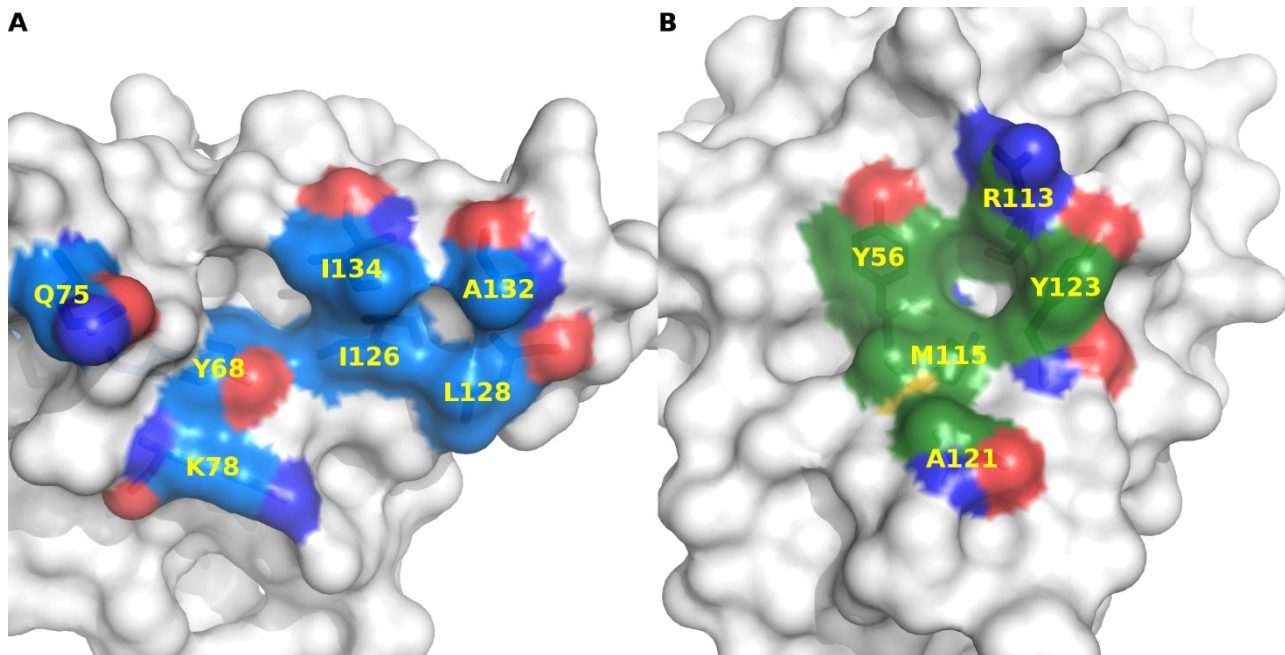

Figure S3. Hot spots (colored surface and labeled in yellow colors) in PD-1 (A) and PD-L1 (B) predicted by over 50% of the methods as listed in Table 4
